# Supplementary material for: Evolution of the Illegal Substances Market and Substance Users’ Social Situation and Health during the COVID-19 Pandemic
Source: MDPI journal article supplement (doi:10.3390/ijerph18094960), 2021-05-07
Supplement: s1 [file s1]

## Questionnaire auprès des usagers de substances

Nous souhaitons comprendre l'évolution du marché des stupéfiants dans le contexte de l'épidémie du nouveau coronavirus pour mieux connaître la situation que rencontrent les consommateurs de stupéfiants et évaluer si les services actuels sont adaptés à leurs besoins.

Toutes les informations que vous nous donnez sont **totale**ment anonymes et ne serviront qu'à comprendre la situation actuelle. Aucune donnée ne sera transmise plus loin.

### Consommation de substances du marché noir

#### 1. Avez-vous consommé de l'**héroïne** au cours des 7 derniers jours ?

☐ Non

☐ Oui

Si oui, à quelle fréquence ?

– Nombre de jours : ☐ 1 ☐ 2 ☐ 3 ☐ 4 ☐ 5 ☐ 6 ☐ 7

– Combien de fois par jour de consommation (en moyenne) :

Comment l'avez-vous obtenu ?

(Plusieurs réponses possibles)

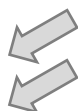
☐ Stock personnel

☐ Reçu par un proche / ami-e

☐ Acheté à un consommateur

☐ Acheté à un trafiquant (quelqu'un qui ne consomme pas)

Sous quelle forme l'avez-vous

acheté et à quel prix ?

(Plusieurs réponses possibles)

☐ En pacson / paquet au prix de  Frs pour  g

☐ En grip / sachet au prix de  Frs pour  g

☐ Autre, Préciser :  au prix de  Frs pour  g

A votre avis, quelle est la pureté de l'héroïne que vous avez achetée ?

☐ Faible (0-10%)

☐ Moyenne (11-20%)

☐ Élevée (21-30%)

☐ Très élevée (+ de 30%)

#### 2. Avez-vous consommé de la **cocaïne** au cours des 7 derniers jours ?

☐ Non

☐ Oui

Si oui, à quelle fréquence ?

– Nombre de jours : ☐ 1 ☐ 2 ☐ 3 ☐ 4 ☐ 5 ☐ 6 ☐ 7

– Combien de fois par jour de consommation (en moyenne) :

Comment l'avez-vous obtenu ?

(Plusieurs réponses possibles)

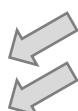
☐ Stock personnel

☐ Reçu par un proche / ami-e

☐ Acheté à un consommateur

☐ Acheté à un trafiquant (quelqu'un qui ne consomme pas)

Sous quelle forme l'avez-vous

acheté et à quel prix ?

(Plusieurs réponses possibles)

☐ Petite boulette au prix de  Frs pour  g

☐ Grosse boulette / parachute au prix de  Frs pour  g

☐ Autre, Préciser :  au prix de  Frs pour  g

A votre avis, quelle est la pureté de la cocaïne que vous avez achetée ?

☐ Faible (0-25%)

☐ Moyenne (26-50%)

☐ Élevée (51-75%)

☐ Très élevée (+ de 75%)

### 3. Avez-vous consommé du **cannabis** au cours des 7 derniers jours ?

☐ Non

☐ Oui

Si oui, à quelle fréquence ?

– Nombre de jours :

☐ 1

☐ 2

☐ 3

☐ 4

☐ 5

☐ 6

☐ 7

– Combien de fois par jour de consommation (en moyenne) :

Comment l'avez-vous obtenu ?

(Plusieurs réponses possibles)

☐ Stock personnel

☐ Reçu par un proche / ami-e

☐ Acheté à un consommateur

☐ Acheté à un trafiquant (quelqu'un qui ne consomme pas)

Sous quelle forme l'avez-vous

acheté et à quel prix ?

(Plusieurs réponses possibles)

☐ Herbe

au prix de

 Frs

pour

 g

☐ Résine (hash, shit)

au prix de

 Frs

pour

 g

☐ Autre, Préciser :

au prix de

 Frs

pour

 g

A votre avis, quel est le taux de THC du cannabis que vous avez acheté ?

☐ Faible (0-5%)

☐ Moyen (6-10%)

☐ Élevé (11-15%)

☐ Très élevé (+ de 15%)

### Impact de l'épidémie sur votre consommation et votre santé

La situation actuelle **d'épidémie** (disponibilité des drogues, distanciation sociale, etc.) a-t-elle une **influence sur votre consommation** :

|                                  | Diminuée                   |                            | Habituelle                 |                            | Augmentée                  |                          | Pas<br>utilisé |
|----------------------------------|----------------------------|----------------------------|----------------------------|----------------------------|----------------------------|--------------------------|----------------|
| – d’héroïne                      | <input type="checkbox"/> 1 | <input type="checkbox"/> 2 | <input type="checkbox"/> 3 | <input type="checkbox"/> 4 | <input type="checkbox"/> 5 | <input type="checkbox"/> |                |
| – de cocaïne                     | <input type="checkbox"/> 1 | <input type="checkbox"/> 2 | <input type="checkbox"/> 3 | <input type="checkbox"/> 4 | <input type="checkbox"/> 5 | <input type="checkbox"/> |                |
| – de cannabis                    | <input type="checkbox"/> 1 | <input type="checkbox"/> 2 | <input type="checkbox"/> 3 | <input type="checkbox"/> 4 | <input type="checkbox"/> 5 | <input type="checkbox"/> |                |
| – d’alcool                       | <input type="checkbox"/> 1 | <input type="checkbox"/> 2 | <input type="checkbox"/> 3 | <input type="checkbox"/> 4 | <input type="checkbox"/> 5 | <input type="checkbox"/> |                |
| – de médicaments (par ex. benzo) | <input type="checkbox"/> 1 | <input type="checkbox"/> 2 | <input type="checkbox"/> 3 | <input type="checkbox"/> 4 | <input type="checkbox"/> 5 | <input type="checkbox"/> |                |
| – d’autres drogues               | <input type="checkbox"/> 1 | <input type="checkbox"/> 2 | <input type="checkbox"/> 3 | <input type="checkbox"/> 4 | <input type="checkbox"/> 5 | <input type="checkbox"/> |                |

La situation actuelle **d'épidémie** a-t-elle une **influence sur votre situation** et votre santé :

|                                   | Pas d'impact               |                            |                            | Un grand impact            |                            |
|-----------------------------------|----------------------------|----------------------------|----------------------------|----------------------------|----------------------------|
| – situation sociale et financière | <input type="checkbox"/> 1 | <input type="checkbox"/> 2 | <input type="checkbox"/> 3 | <input type="checkbox"/> 4 | <input type="checkbox"/> 5 |
| – peur des contrôles de police    | <input type="checkbox"/> 1 | <input type="checkbox"/> 2 | <input type="checkbox"/> 3 | <input type="checkbox"/> 4 | <input type="checkbox"/> 5 |
| – vol de produit, racket          | <input type="checkbox"/> 1 | <input type="checkbox"/> 2 | <input type="checkbox"/> 3 | <input type="checkbox"/> 4 | <input type="checkbox"/> 5 |
| – niveau de stress, d'angoisse    | <input type="checkbox"/> 1 | <input type="checkbox"/> 2 | <input type="checkbox"/> 3 | <input type="checkbox"/> 4 | <input type="checkbox"/> 5 |
| – santé mentale en générale       | <input type="checkbox"/> 1 | <input type="checkbox"/> 2 | <input type="checkbox"/> 3 | <input type="checkbox"/> 4 | <input type="checkbox"/> 5 |
| – santé physique en générale      | <input type="checkbox"/> 1 | <input type="checkbox"/> 2 | <input type="checkbox"/> 3 | <input type="checkbox"/> 4 | <input type="checkbox"/> 5 |

A votre avis, comment pourrait-on mieux aider les consommateurs de stupéfiants dans la situation actuelle ?

### Vous êtes...

Sexe :

☐ H

☐ F

Age :

Situation professionnelle :

☐ Emploi

☐ Autres

**Merci beaucoup pour votre participation !**
